# Supplementary material
Source: PubMed Central journal article supplement (PMC11028679)
Supplement: 262_2011_1073_MOESM1_ESM.pdf [file 262_2011_1073_MOESM1_ESM.pdf]

Supplementary Figure 1. Distribution by fibrosis and necrosis

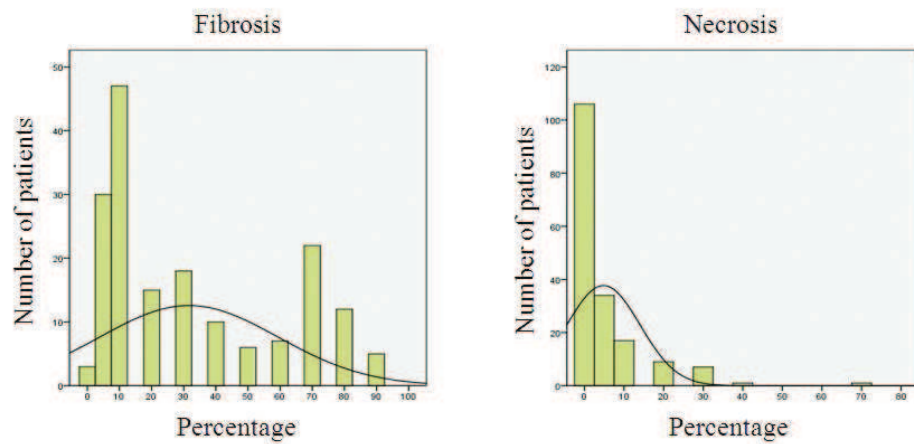

Distribution by fibrosis and necrosis  
75x42mm (300 x 300 DPI)
